# Supplementary material
Source: publisher figshare collection journal article supplement (https://asha.figshare.com/articles/dataset/_/28585145)
Supplement: Supplementary file 1 [file 1]

**Supplemental Material S3.** Results of GLM analysis of outcome measures performed for separate hearing-loss subgroups.

**GLM analyses for subgroups with either mild or moderate audiometric hearing loss for PHAB global (primary) and HHIE total benefit (secondary) at 6 weeks (S2) and 6 months (S3) for ITT analyses only.**

Mild Hearing Loss

Table S1. Boot-strapped (N=1000, Bias-Corrected and accelerated, BCa) General Linear Model (GLM) analyses of primary (PHAB global) and secondary (HHIE total benefit) outcomes.

|                                                       |                         |     |             |         |       |                     |
|-------------------------------------------------------|-------------------------|-----|-------------|---------|-------|---------------------|
| Dependent Variable:<br>PHAB global S2                 |                         |     |             |         |       |                     |
| Source                                                | Type III Sum of Squares | df  | Mean Square | F       | Sig.  | Partial Eta Squared |
| Corrected Model                                       | 3898.180                | 11  | 354.380     | 2.130   | .018  | .076                |
| Intercept                                             | 71492.214               | 1   | 71492.214   | 429.788 | <.001 | .600                |
| Site                                                  | 3181.554                | 3   | 1060.518    | 6.375   | <.001 | .063                |
| Fit Method                                            | 134.294                 | 2   | 67.147      | .404    | .668  | .003                |
| Site * Fit Method                                     | 669.157                 | 6   | 111.526     | .670    | .674  | .014                |
| Error                                                 | 47574.123               | 286 | 166.343     |         |       |                     |
| Total                                                 | 122797.354              | 298 |             |         |       |                     |
| Corrected Total                                       | 51472.303               | 297 |             |         |       |                     |
| R <sup>2</sup> = .076 (Adjusted R <sup>2</sup> = .04) |                         |     |             |         |       |                     |

|                                       |  |  |  |  |  |  |
|---------------------------------------|--|--|--|--|--|--|
| Dependent Variable:<br>PHAB global S3 |  |  |  |  |  |  |
|---------------------------------------|--|--|--|--|--|--|

| Source                                                 | Type III Sum of Squares | df  | Mean Square | F       | Sig.  | Partial Eta Squared |
|--------------------------------------------------------|-------------------------|-----|-------------|---------|-------|---------------------|
| Corrected Model                                        | 4060.616                | 11  | 369.147     | 2.206   | .014  | .078                |
| Intercept                                              | 65229.589               | 1   | 65229.589   | 389.865 | <.001 | .577                |
| Site                                                   | 3181.400                | 3   | 1060.467    | 6.338   | <.001 | .062                |
| Fit Method                                             | 360.810                 | 2   | 180.405     | 1.078   | .342  | .007                |
| Site * Fit Method                                      | 440.713                 | 6   | 73.452      | .439    | .852  | .009                |
| Error                                                  | 47851.640               | 286 | 167.313     |         |       |                     |
| Total                                                  | 116265.906              | 298 |             |         |       |                     |
| Corrected Total                                        | 51912.256               | 297 |             |         |       |                     |
| R <sup>2</sup> = .078 (Adjusted R <sup>2</sup> = .043) |                         |     |             |         |       |                     |

|                                                        |                         |     |             |         |       |                     |
|--------------------------------------------------------|-------------------------|-----|-------------|---------|-------|---------------------|
| Dependent Variable:<br>HHIE total Benefit S2           |                         |     |             |         |       |                     |
| Source                                                 | Type III Sum of Squares | df  | Mean Square | F       | Sig.  | Partial Eta Squared |
| Corrected Model                                        | 10071.234               | 11  | 915.567     | 3.264   | <.001 | .112                |
| Intercept                                              | 116150.652              | 1   | 116150.652  | 414.079 | <.001 | .591                |
| Site                                                   | 6267.735                | 3   | 2089.245    | 7.448   | <.001 | .072                |
| Fit Method                                             | 1224.719                | 2   | 612.359     | 2.183   | .115  | .015                |
| Site * Fit Method                                      | 2008.084                | 6   | 334.681     | 1.193   | .310  | .024                |
| Error                                                  | 80224.068               | 286 | 280.504     |         |       |                     |
| Total                                                  | 201701.733              | 298 |             |         |       |                     |
| Corrected Total                                        | 90295.302               | 297 |             |         |       |                     |
| R <sup>2</sup> = .112 (Adjusted R <sup>2</sup> = .077) |                         |     |             |         |       |                     |

|                                              |  |  |  |  |  |  |
|----------------------------------------------|--|--|--|--|--|--|
| Dependent Variable:<br>HHIE total Benefit S3 |  |  |  |  |  |  |
|----------------------------------------------|--|--|--|--|--|--|

| Source                                                 | Type III Sum of Squares | df  | Mean Square | F       | Sig.  | Partial Eta Squared |
|--------------------------------------------------------|-------------------------|-----|-------------|---------|-------|---------------------|
| Corrected Model                                        | 8179.796                | 11  | 743.618     | 2.525   | .005  | .089                |
| Intercept                                              | 126862.101              | 1   | 126862.101  | 430.819 | <.001 | .601                |
| Site                                                   | 3700.021                | 3   | 1233.340    | 4.188   | .006  | .042                |
| Fit Method                                             | 1251.294                | 2   | 625.647     | 2.125   | .121  | .015                |
| Site * Fit Method                                      | 2687.092                | 6   | 447.849     | 1.521   | .171  | .031                |
| Error                                                  | 84217.567               | 286 | 294.467     |         |       |                     |
| Total                                                  | 220031.160              | 298 |             |         |       |                     |
| Corrected Total                                        | 92397.363               | 297 |             |         |       |                     |
| R <sup>2</sup> = .089 (Adjusted R <sup>2</sup> = .053) |                         |     |             |         |       |                     |

### Moderate Hearing Loss

Table S2. Boot-strapped (N=1000, Bias-Corrected and accelerated, BCa) General Linear Model (GLM) analyses of primary (PHAB global) and secondary (HHIE total benefit) outcomes.

| Dependent Variable:<br>PHAB global S2 |                         |     |             |         |       |                     |
|---------------------------------------|-------------------------|-----|-------------|---------|-------|---------------------|
| Source                                | Type III Sum of Squares | df  | Mean Square | F       | Sig.  | Partial Eta Squared |
| Corrected Model                       | 2067.329                | 11  | 187.939     | .784    | .656  | .039                |
| Intercept                             | 69875.839               | 1   | 69875.839   | 291.439 | <.001 | .578                |
| Site                                  | 1429.005                | 3   | 476.335     | 1.987   | .117  | .027                |
| Fit Method                            | 237.163                 | 2   | 118.582     | .495    | .611  | .005                |
| Site * Fit Method                     | 270.901                 | 6   | 45.150      | .188    | .980  | .005                |
| Error                                 | 51069.128               | 213 | 239.761     |         |       |                     |
| Total                                 | 122141.752              | 225 |             |         |       |                     |
| Corrected Total                       | 53136.457               | 224 |             |         |       |                     |

|                                       |  |  |  |  |  |  |
|---------------------------------------|--|--|--|--|--|--|
| $R^2 = .039$ (Adjusted $R^2 = .011$ ) |  |  |  |  |  |  |
|---------------------------------------|--|--|--|--|--|--|

| Dependent Variable: PHAB global S3    |                         |     |             |         |       |                     |
|---------------------------------------|-------------------------|-----|-------------|---------|-------|---------------------|
| Source                                | Type III Sum of Squares | df  | Mean Square | F       | Sig.  | Partial Eta Squared |
| Corrected Model                       | 2292.803                | 11  | 208.437     | .922    | .520  | .045                |
| Intercept                             | 67847.234               | 1   | 67847.234   | 300.019 | <.001 | .585                |
| Site                                  | 1556.810                | 3   | 518.937     | 2.295   | .079  | .031                |
| Fit Method                            | 224.823                 | 2   | 112.412     | .497    | .609  | .005                |
| Site * Fit Method                     | 438.835                 | 6   | 73.139      | .323    | .924  | .009                |
| Error                                 | 48168.543               | 213 | 226.143     |         |       |                     |
| Total                                 | 117951.461              | 225 |             |         |       |                     |
| Corrected Total                       | 50461.345               | 224 |             |         |       |                     |
| $R^2 = .045$ (Adjusted $R^2 = .004$ ) |                         |     |             |         |       |                     |

| Dependent Variable: HHIE total Benefit S2 |                         |     |             |         |       |                     |
|-------------------------------------------|-------------------------|-----|-------------|---------|-------|---------------------|
| Source                                    | Type III Sum of Squares | df  | Mean Square | F       | Sig.  | Partial Eta Squared |
| Corrected Model                           | 4854.590                | 11  | 441.326     | 1.329   | .210  | .064                |
| Intercept                                 | 112646.448              | 1   | 112646.448  | 339.301 | <.001 | .614                |
| Site                                      | 1490.347                | 3   | 496.782     | 1.496   | .217  | .021                |
| Fit Method                                | 889.066                 | 2   | 444.533     | 1.339   | .264  | .012                |
| Site * Fit Method                         | 2389.445                | 6   | 398.241     | 1.200   | .308  | .033                |
| Error                                     | 70714.985               | 213 | 331.995     |         |       |                     |
| Total                                     | 192590.910              | 225 |             |         |       |                     |
| Corrected Total                           | 75569.575               | 224 |             |         |       |                     |

|                                                           |  |  |  |  |  |  |
|-----------------------------------------------------------|--|--|--|--|--|--|
| R <sup>2</sup> = .064 (Adjusted<br>R <sup>2</sup> = .016) |  |  |  |  |  |  |
|-----------------------------------------------------------|--|--|--|--|--|--|

|                                                           |                            |     |                |         |       |                           |
|-----------------------------------------------------------|----------------------------|-----|----------------|---------|-------|---------------------------|
| Dependent Variable:<br>HHIE total Benefit S3              |                            |     |                |         |       |                           |
| Source                                                    | Type III Sum of<br>Squares | df  | Mean<br>Square | F       | Sig.  | Partial<br>Eta<br>Squared |
| Corrected Model                                           | 5404.325                   | 11  | 491.302        | 1.307   | .222  | .063                      |
| Intercept                                                 | 138985.004                 | 1   | 138985.004     | 369.808 | <.001 | .635                      |
| Site                                                      | 3033.343                   | 3   | 1011.114       | 2.690   | .047  | .037                      |
| Fit Method                                                | 873.988                    | 2   | 436.994        | 1.163   | .315  | .011                      |
| Site * Fit Method                                         | 1497.026                   | 6   | 249.504        | .664    | .679  | .018                      |
| Error                                                     | 80051.802                  | 213 | 375.830        |         |       |                           |
| Total                                                     | 226117.452                 | 225 |                |         |       |                           |
| Corrected Total                                           | 85456.128                  | 224 |                |         |       |                           |
| R <sup>2</sup> = .063 (Adjusted<br>R <sup>2</sup> = .015) |                            |     |                |         |       |                           |
